# Bayesian parameter estimation for phosphate dynamics during hemodialysis

Katrine O. Bangsgaard\*   Morten Andersen †   James G. Heaf‡  
Johnny T. Ottesen†

## Abstract

Hyperphosphatemia in patients with renal failure is associated with increased vascular calcification and mortality. Hemodialysis is a conventional treatment for patients with hyperphosphatemia. Phosphate kinetics during hemodialysis may be described by a diffusion process and modeled by ordinary differential equations. We propose a Bayesian model approach for estimating patient-specific parameters for phosphate kinetics during hemodialysis. The Bayesian approach allows us to both analyze the full parameter space using uncertainty quantification and to compare two types of hemodialysis treatments, the conventional single-pass and the novel multiple-pass treatment. We validate and test our models on synthetic and real data. The results show limited identifiability of the model parameters when only single-pass data are available, and that the Bayesian model greatly reduces the relative standard deviation compared to existing estimates. Moreover, the analysis of the Bayesian models reveal improved estimates with reduced uncertainty when considering consecutive sessions and multiple-pass treatment compared to single-pass treatment.

**Keywords:** hemodialysis, phosphate kinetics, mathematical modeling, parameter estimation, uncertainty quantification

---

\*Department of Applied Mathematics and Computer Science, Technical University of Denmark, Richard Petersens Plads, Building 324, 2800 Kongens Lyngby, Denmark

†Centre for Mathematical Modeling – Human Health and Disease, Roskilde University, 4000 Roskilde, Denmark

‡Dept. Medicine, Zealand University Hospital, 4000 Roskilde, Denmark

## 22 **1 Introduction**

23 Phosphate enables the body to perform vital processes such as construction of nucleic  
24 acids, energy transport and bone tissue formation [3]. The level of phosphate is tightly  
25 controlled, and excess phosphate is excreted by the kidneys [20]. However, for patients  
26 with renal failure, the control of phosphate homeostasis is impaired. An abnormal level of  
27 phosphate is associated with increased vascular calcification and mortality [5, 16].

28 About half of all dialysis patients suffer from hyperphosphataemia, and strategies to  
29 control phosphate levels include phosphate binders, low-phosphate diet and removal of  
30 phosphate by hemodialysis [11]. Hemodialysis (HD) is a conventional treatment for renal  
31 failure where a patient is coupled to a dialysis machine for four to eight hours. The blood  
32 plasma and dialysate fluid are passed through a filter that causes a diffusion process that  
33 removes toxic substances, e.g., phosphate, from the blood to the dialysate. The phosphate  
34 kinetics in HD is of particular interest because it differs the other removed toxins, e.g.,  
35 urea, by the fact that hypophosphataemia is fatal for the patient [25]. Thus, the phosphate  
36 concentration should not be exhausted, but kept within the critical values.

### 37 **1.1 Previous studies**

38 The control of the phosphate concentration is a considerable clinical problem and has been  
39 studied extensively [1, 2, 5, 6, 7, 8, 12, 17, 18, 24]. The conventional hemodialysis treatment  
40 is the single-pass (SP) treatment. Agar et al. [1] and Debowska et al. [5] both study  
41 the SP treatment by considering a simple two-compartment ordinary differential equation  
42 (ODE) model for phosphate removal during HD. They present their results as an average  
43 of the measured patients to obtain confidence intervals for their parameters, however, these  
44 are not patient specific. Poleszczuk et al. [20] extend the model proposed by Debowska  
45 et al. [5] to include a time delay. The time delay is introduced to improve the fit at the  
46 later stage of the HD where a minor rebound is observed in some clinical experiments.  
47 Andersen et al. [2] analyze the same model analytically and estimate parameters using an  
48 optimization-driven approach. Here the parameters are estimated for each patient, but  
49 the uncertainty of the parameter estimates is not addressed. Laursen et al. [17] propose a  
50 two- and three-compartment model for phosphate clearance during single pass and find

51 that the three-compartment model produces the most satisfying fit but does not address  
52 the uncertainty associated with the parameter estimates. Spalding et al. [24] propose a  
53 complicated four-compartment model where the fourth pool is a control pool for avoiding  
54 dangerously low phosphate concentrations. They argue that a simple two-compartment  
55 model cannot fit the relapse phase sufficiently, however, both Andersen et al. [2] and  
56 Debowska et al. [5] demonstrate that the simple two-compartment model can produce  
57 adequate fits for the relapse phase as well.

58 A novel HD treatment called multiple pass (MP) [7, 8, 12] provides an alternative to  
59 the conventional SP. This novel treatment reduces the amount of dialysis fluid needed for  
60 a single session of HD. Andersen et al. [2] and Heaf et al. [12] analyse and compare the  
61 MP treatment and SP treatment.

62 However, none of the above-listed models address patient specific uncertainties associated  
63 with the parameter estimates. Moreover, the reported uncertainty of the parameter estimates  
64 for the average of the measured patients is very large, e.g., Debowska et al. [5] report a  
65 phosphate clearance with a relative standard deviation of 79% and Agar et al. [1] report a  
66 relative standard deviation of 47%, indicating that parameters of the two-compartment  
67 model are poorly identified. Common for all models is that they assume that the phosphate  
68 concentration in the inner-source compartment is known exactly through measurements at  
69 time zero. However, measurements are noisy and can potentially bias the results.

70 The Bayesian approach for parameter estimation for ODE modeling has gained attention  
71 in later years [14, 22] since it provides an elegant way of addressing the uncertainty associated  
72 with the estimated parameters and includes clinical knowledge. The Bayesian approach  
73 gives a complete image of the parameter estimation in terms of uncertainty quantification,  
74 i.e., posterior mean, credibility intervals and correlations. A Bayesian approach for patient-  
75 specific parameters for hemodialysis has been proposed by Bianchi et al. [4] but does not  
76 consider the phosphate kinetics.

## 77 **1.2 Contribution**

78 We propose a Bayesian approach for estimating patient-specific parameters for phosphate  
79 dynamics during hemodialysis. Moreover, we include the phosphate concentration in the  
80 inner compartment as a parameter of the model. We use uncertainty quantification to

81 assess the reliability of our parameter estimates and explore the full parameter space. We  
82 address the identifiability of the parameters for the SP, MP and the combination of the two,  
83 denoted combined pass (CP). In addition, we also investigate how the parameter estimation  
84 can be improved by including relapse measurements and / or measure consecutive sessions.

### 85 **1.3 Outline**

86 Section 2 describes the phosphate kinetics during hemodialysis and introduces the single-  
87 and multiple-pass treatments. Section 3 introduces the Bayesian model and describes  
88 implementation and sampling diagnostics. In Section 4, we test and validate SP, MP and  
89 CP models on data sets and discuss findings from synthetic data which are found in the  
90 supplementary materials. Lastly, we conclude the paper in Section 5.

## 91 **2 Hemodialysis modeling**

92 About 85% of the total phosphate in the human body is stored in the bones [15]. We  
93 assume that we have an inexhaustible source (bone) that excretes phosphate to the blood,  
94 including extracellular fluid. The phosphate transport from source to blood is driven by  
95 diffusion. The diffusion process is governed by the diffusion coefficient (permeability) and  
96 concentration gradient. The blood compartment is coupled to the dialysate compartment  
97 through a semipermeable membrane which generates a flow of phosphate to the dialysate  
98 fluid. The flow of phosphate from blood to dialysate is mainly governed by diffusion and to  
99 an insignificant degree by a convection process. [17] However, comprehensive investigations  
100 have shown that the convective flow has a negligible effect on the model and parameters  
101 during the normal range of dialysis treatment, i.e., up to eight hours [2]. Thus, we exclude  
102 the convection term from the models. In this paper, we consider three types of models  
103 for HD for phosphate clearance in dialysis patients, the conventional SP, MP and the  
104 combination CP.

105 The value of this analysis for clinicians is twofold. Firstly, accurate modeling permits  
106 the prediction of phosphate removal during different forms of dialysis, e.g., short and long  
107 dialysis or use of filters with standard or high phosphate clearances. Secondly, it is possible  
108 to get insight into the underlying physiological causes of phosphate dynamics.

## 109 2.1 Single-pass dialysis

110 For the SP treatment, the dialysate is constantly replenished by fresh dialysate such that  
 111 the phosphate concentration in the outflowing dialysate remains low. Data shows this  
 112 phosphate concentration to be approximately constant throughout the treatment. SP  
 113 requires excessive amounts of dialysate for each session. A conceptual diagram of the SP  
 treatment is depicted in Figure 1 that illustrates the removal of phosphate by diffusion.

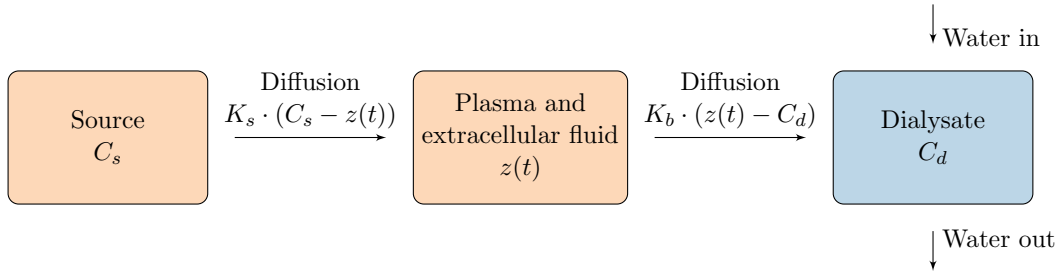

Figure 1: Conceptual diagram for single pass (SP). In SP, blood and dialysate are passed through a filter which initiates a diffusion process that removes toxic substances from the blood (plasma and extracellular fluid). The outflowing dialysate is constantly replenished by fresh dialysate, and the concentration of phosphate in the dialysate is assumed constant.

114

Agar et al. [1] proposed a simple compartment model for SP consisting of a single linear autonomous ODE,

$$V_b \frac{dz(t)}{dt} = C_s K_s - (K_s + K_b)z(t) + K_b C_d, \quad (1)$$

115 where  $z(t)$  is the concentration of phosphate in the blood compartment at time  $t$ ,  $C_s$  is the  
 116 constant concentration in the source compartment and  $C_d$  is the phosphate concentration  
 117 in the dialysate assumed to be constant and measurable.  $K_s$  and  $K_b$  are diffusion rates  
 118 from source to blood and from blood to dialysate, respectively. Lastly,  $V_b$  denotes the  
 119 blood volume taken as the blood plasma and extracellular volume. For the system to have  
 120 a unique solution, we equip the ODE with the initial condition  $z(0) = z_0$ . Notice that the  
 121 system is not identifiable since  $V_b$  can be integrated in the remaining parameters and thus  
 122 we assume that  $V_b$  is known through measurements for single-pass.

123 The assumption of a constant  $C_d$  is not crucial. If we allow the phosphate concentration  
 124 to be a variable with initial value 0, then we can extend the model by an extra differential  
 125 equation. This extension results in a fast transient in  $C_d$  toward the steady state value

126 given by data shown in Table 1 with at doubling time of approximately 10-15 minutes  
 127 (see supplementary, Figure S.14). Moreover, such extension does not affect the parameter  
 128 estimates achieved. Hence we confine ourselves to consider  $C_d$  as a constant.

## 129 2.2 Multiple-pass dialysis

130 Contrary to SP where dialysate is constantly replenished, the dialysate for MP is recirculated,  
 131 and consequently, the removed substances accumulate in the dialysate fluid over time. A  
 132 conceptual diagram of the MP treatment is depicted in Figure 2.

133 MP is less effective than SP due to the accumulation of substances in dialysate. However,  
 134 MP greatly reduces the amount of dialysate fluid needed for HD treatment, which makes  
 135 a smaller clinical setting possible. Furthermore, it may ease HD treatment at home and  
 136 treatment during travels, which can possibly greatly improve the quality of life for renal  
 137 failure patients. [7, 8, 12]

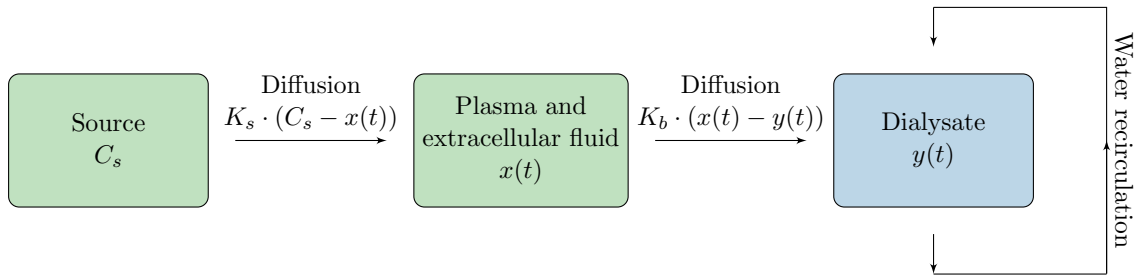

Figure 2: Conceptual diagram for multiple pass (MP) treatment. Like in conventional SP, blood and dialysate is passed through a filter that causes a diffusion process that removes toxic substances from the blood (plasma and extracellular fluid). The dialysate is recirculated and consequently, the removed substances accumulate in the dialysate, i.e.,  $y(t)$  changes as a function of time.

The MP model can be described by the following system of linear autonomous ODEs,

$$V_b \frac{dx(t)}{dt} = C_s K_s - (K_s + K_b)x(t) + K_b y(t), \quad (2a)$$

$$V_d \frac{dy(t)}{dt} = K_b(x(t) - y(t)), \quad (2b)$$

138 where  $x(t)$  and  $y(t)$  are the time-varying phosphate concentrations for the blood compart-  
 139 ment and in the dialysate at time  $t$ , respectively, and  $V_d$  is the volume of the dialysate.  
 140 The remaining parameters, i.e.,  $V_b$ ,  $C_s$ ,  $K_s$  and  $K_b$ , have the same interpretation as for the

141 SP model in (1). The initial conditions are  $x(0) = x_0$  and  $y(0) = y_0$  corresponding to the  
142 phosphate concentration in blood and dialysate at time  $t = 0$ , respectively. The phosphate  
143 concentration in the dialysate at time  $t = 0$  is zero, i.e., we assume  $y_0 = 0$  henceforth.

144 The MP model carries additional information compared to the SP model since the  
145 only new parameter, the dialysate volume ( $V_d$ ) is assumed known and can be estimated  
146 reliably from available data. Hence, we have an additional equation in the model but the  
147 same number of unknown parameters compared to SP. Thus, given sufficient data, the  
148 MP model allows for structural identifiability of the parameters due to the addition of  
149 (2b) since we cannot simply integrate  $V_b$  in the remaining parameters. However, when  
150 measurements of  $V_b$  are available, we will consider  $V_b$  to be known a priori.

### 151 2.3 Combined-pass dialysis

The parameters for a single patient are shared for the two treatments. Thus, if a patient  
completes both SP and MP, we can utilize all available information by considering the CP  
model,

$$V_b \frac{dz(t)}{dt} = C_s K_s - (K_s + K_b)z(t) + K_b C_d, \quad (3a)$$

$$V_b \frac{dx(t)}{dt} = C_s K_s - (K_s + K_b)x(t) + K_b y(t), \quad (3b)$$

$$V_d \frac{dy(t)}{dt} = K_b(x(t) - y(t)), \quad (3c)$$

152 with  $z(0) = z_0$ ,  $x(0) = x_0$  and  $y(0) = 0$ , and the parameters as described for SP. The CP  
153 model, just as the MP model, allows for structural identifiability, and potentially even  
154 more precise estimation compared to the MP model due to the addition of the SP model.

### 155 2.4 Clinical data

156 We consider longitudinal data sets from 10 patients with renal failure that were measured  
157 during an SP session and an MP session. The measured phosphate concentrations for SP  
158 and MP ( $Z$ ,  $X$  and  $Y$ ) are depicted in Figure 3. Measurements were once every hour for a  
159 total of four and eight hours for SP and MP, respectively. No measurements were taken in  
160 the relapse phase, i.e., after ended treatment.

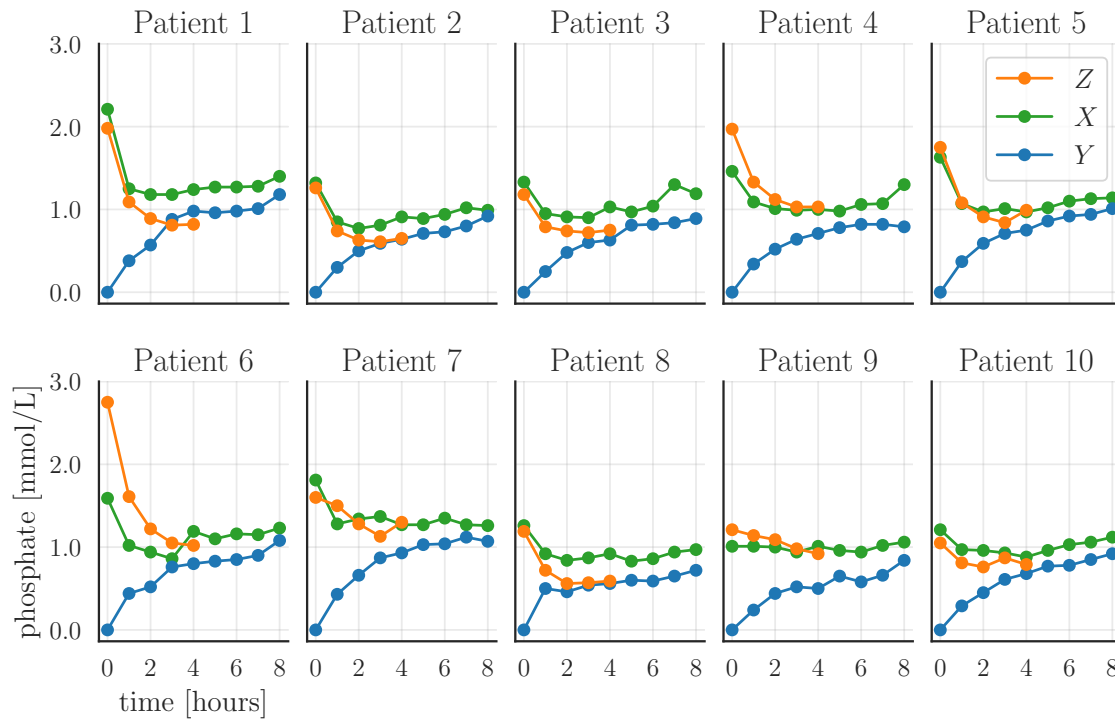

Figure 3: Visualization of the measured phosphate concentrations for SP and MP. The dots represent the measurements, and the full line is the linear interpolation of the measurements. The concentration of phosphate in dialysate in MP is denoted  $Y$  and the phosphate concentration in the blood is denoted  $Z$  and  $X$  for SP and MP, respectively.

161 Considering the SP measurements (orange dotted line) in Figure 3, we see an exponential-  
 162 like decay in the measured phosphate concentration after two hours as predicted by (1).  
 163 Thereafter, phosphate concentration seems to stabilize around a reduced concentration level.  
 164 For the MP measurements (green and blue dotted lines), we see similar exponential-like  
 165 decay for the phosphate concentration in agreement with the bi-exponential solution to (2).  
 166 However, this drop in phosphate concentration is a bit slower for some patients and after two  
 167 hours it starts to slowly increase due to the accumulation of phosphate in the dialysate. The  
 168 phosphate concentration in the dialysate increases rapidly in the beginning of the treatment  
 169 but slows down and approaches an equilibrium with the phosphate concentration in the  
 170 blood. This behavior is expected according to the model in (2) since the concentration  
 171 gradient vanishes.



## 172 **3 Bayesian inference**

173 We solve the parameter estimation problem using a Bayesian approach, where we consider  
174 the parameters, measurement noise and initial conditions as random variables. In Bayesian  
175 inference, we are interested in the posterior probability of the parameters. The posterior  
176 probability consists of two components: a prior probability reflecting our knowledge or  
177 beliefs about likely parameter values, and a likelihood function that expresses how likely it  
178 is to observe the data for a set of parameters. Thus, the posterior allows us to formally  
179 include clinical prior knowledge in the model. Moreover, the inclusion of the prior may have  
180 a regularizing effect on the parameter estimation problem in the sense that the parameter  
181 estimates become less sensitive to measurement noise.

182 We use uncertainty quantification to assess the reliability of the parameter estimates  
183 and the concentrations in terms of posterior statistics, i.e., mean, correlation and 95%  
184 credibility intervals (CI). A strength of the uncertainty quantification is that the solution  
185 is based on all probable outcomes instead of being solely based on a point estimate [23].  
186 Uncertainty quantification can also be used for model analysis and improvement, e.g.,  
187 revealing strong correlation or identifying potential measurements that could improve  
188 identifiability of the model [26]. Hence, uncertainty quantification is a flexible method to  
189 assess how certain we are of the parameter values and parameter-dependent solutions

### 190 **3.1 Likelihood and prior modeling**

191 We describe the Bayesian model for the SP and MP treatments and presume data for the  
192 relevant state variables (phosphate concentrations) are measured. Notice that the Bayesian  
193 formulation is trivially extended to CP by combining the SP and MP models.

#### 194 **3.1.1 Single-pass formulation**

195 First, we consider the Bayesian formulation for SP. Let  $\theta = [C_s, K_s, K_b]$  denote the vector  
196 of unknown parameters and  $z_{IC}$  denote the initial condition for SP. We assume that  $V_b$   
197 and  $C_d$  are known to a sufficient degree a priori and do not estimate them based on the  
198 model. A justification of this assumption is given in Section 4.

199 The state variable  $z(t, \theta, z_{IC})$  is the solution to (1) and we wish to infer the model

200 parameters  $\theta$  and initial condition  $z_{\text{IC}}$  defining the state variable. Henceforth, we shorten  
201 notation such that  $z(t) \equiv z(t, \theta, z_{\text{IC}})$ .

We assume that the measurement noise is normally distributed such that the state variable,  $z(t)$  is inferred through the Gaussian likelihood function,

$$Z_i \sim \mathcal{N}(z(t_i), \sigma_d^2), \text{ for } i = 1, 2, \dots, m, \quad (4)$$

202 where  $Z \in \mathbb{R}^m$  is a vector with the measurement of the phosphate concentration in the blood  
203 at time  $t = t_i$ . The parameter  $\sigma_d^2 \in \mathbb{R}_+$  is a hyperparameter describing the variance of the  
204 measurement noise. The hyperparameter  $\sigma_d^2$  is not known a priori. Thus, we infer  $\sigma_d^2$  as a  
205 parameter of the model and assign an inverse gamma prior [23]. We enforce non-negativity  
206 on the likelihood function by truncating it at 0 since the phosphate concentrations are  
207 non-negative.

We consider the initial condition  $z_{\text{IC}}$  to have mean equal to the phosphate concentration at time  $t = 0$  and variance  $\sigma_d^2$  equal to the measurement error, i.e.,

$$z_{\text{IC}} \sim \mathcal{N}(Z_0, \sigma_d^2). \quad (5)$$

208 This choice of prior for the initial condition can be interpreted as the initial measurement  
209 following the same measurement model as the measurements for time  $t > 0$ , i.e., we do not  
210 assume that the first measurement is more accurately measured than the subsequent ones.

We model the prior of the unknown parameters  $\theta$  by the Gaussian distribution,

$$\theta \sim \mathcal{N}\left(\begin{bmatrix} \mu_{C_s} \\ \mu_{K_s} \\ \mu_{K_b} \end{bmatrix}, \begin{bmatrix} \sigma_{C_s}^2 & 0 & 0 \\ 0 & \sigma_{K_s}^2 & 0 \\ 0 & 0 & \sigma_{K_b}^2 \end{bmatrix}\right), \quad (6)$$

211 where  $\mu_{C_s}, \mu_{K_s}$  and  $\mu_{K_b}$  represent the prior clinical knowledge, i.e., our prior belief about  
212 most likely parameter values and  $\sigma_{C_s}^2, \sigma_{K_s}^2$  and  $\sigma_{K_b}^2$  are the variances for  $C_s, K_s$  and  $K_b$ ,  
213 respectively. As with the likelihood function, we impose constraints such that we only  
214 consider the parameters in a physiologically meaningful range.

215 As commonly done, we assume that at the start of the dialysis, i.e.,  $t = 0$ , the patient's

216 phosphate concentration is approximately in a steady state, i.e., we assume that  $Z_0$  is  
217 close to  $C_s$  and we choose  $\mu_{C_s} = Z_0$ . The steady state assumption follows from (1) where  
218  $K_b = 0$  when the patient is not receiving dialysis treatment.

219 In previous publications [1, 2, 5]  $C_s$  is fixed to the value of the initial phosphate  
220 measurement. However, the data from Agar et al. [1] show large uncertainty for the first  
221 measurement point. Our choice of prior allows  $C_s$  to deviate from the initial measurement  
222 of the phosphate concentration and thereby our model is not oblivious to measurement  
223 errors for the initial phosphate measurement.

224 We base our values for  $\mu_{K_s}$  and  $\mu_{K_b}$  on literature and we choose  $\mu_{K_s} = 8.06$  L/hour  
225 and  $\mu_{K_b} = 7.56$  L/hour [5].

226 We initially considered  $\sigma_{C_s}^2$ ,  $\sigma_{K_s}^2$  and  $\sigma_{K_b}^2$  to be parameters of the model. However,  
227 preliminary results showed that it greatly decreased the stability of the results. Thus, we  
228 choose  $\sigma_{C_s}^2 = 0.2$ ,  $\sigma_{K_s}^2 = 2.0$  and  $\sigma_{K_b}^2 = 2.0$  based on visual inspection of the prior to  
229 incorporate adequate uncertainty about the prior mean.

### 230 3.1.2 Multiple-pass formulation

The main difference between the MP formulation and the SP formulation is the inclusion of  
an additional state variable through equation 2b. Hence, the likelihood function for MP is

$$\begin{bmatrix} X_i \\ Y_i \end{bmatrix} \sim \mathcal{N} \left( \begin{bmatrix} x(t_i) \\ y(t_i) \end{bmatrix}, \sigma_d^2 I \right), \text{ for } i = 1, 2, \dots, n, \quad (7)$$

where  $X \in \mathbb{R}^n$  and  $Y \in \mathbb{R}^n$  are vectors with the measurements of the phosphate concen-  
tration in the blood and dialysate at time  $t = t_i$ , respectively, and  $I$  is the  $2 \times 2$  identity  
matrix. The initial condition for the phosphate concentration in the dialysate is set to  
zero, i.e.,  $y_{IC} = 0$ , and the initial condition for the phosphate concentration in the blood is  
assigned a prior with mean  $X_0$  and variance equal to the measurement variance, i.e.,

$$x_{IC} \sim \mathcal{N}(X_0, \sigma_d^2). \quad (8)$$

231 Lastly, we choose the prior for the parameters  $\theta$  to be (6) with the exception that  $\mu_{C_s} = X_0$ .

## 232 **3.2 Implementation and diagnostics**

233 We use sampling-based techniques to approximate the posterior [26]. Markov Chain Monte  
234 Carlo (MCMC) is a sampling technique that generates a Markov chain of samples that  
235 converges to the posterior distribution of the parameters [21]. Hence, we can compute  
236 posterior statistics, i.e., mean, 95% CI and correlation from the Markov chain.

237 The simple MCMC techniques such as random walk Metropolis Hastings and the Gibbs  
238 sampler are plagued by inefficient exploration of the parameter space via random walks  
239 and are highly sensitive to correlated parameters. Hamiltonian Monte Carlo (HMC) is an  
240 MCMC method that avoids random walk behavior by taking a series of first-order gradient  
241 informed steps in the simulation and explores the parameter space well even in the case of  
242 correlated parameters. The performance of the HMC sampler is highly sensitive to the  
243 choice of user-specified parameters. However, the No-U-Turn Sampler (NUTS) is an HMC  
244 method where the user-specified parameters are automatically estimated. [13] We use  
245 Runge-Kutta 45 (RK45) to solve the ODE system [19] and the PySTAN implementation of  
246 NUTS [9] with default choice for all associated parameters to compute the samples that  
247 approximate the posterior distribution.

248 For each simulation, we generate four sample chains from random initializations, and  
249 we consider the potential scale reduction statistic, the so-called  $\hat{R}$  value for sampling  
250 diagnostics [10]. The  $\hat{R}$  value measures the ratio of the average variance of samples within  
251 each chain to the variance of the pooled samples across chains, and if all chains are at  
252 equilibrium, then the  $\hat{R}$  value will be one.

## 253 **4 Results**

254 In this section, we consider two data sets for dialysis patients during hemodialysis. For  
255 each patient, we generate 4000 samples and visualize the results in terms of posterior mean  
256 and 95% CIs for the estimated parameters and phosphate concentrations during and after  
257 hemodialysis. In addition, we also visualize the pairwise correlation for the parameters by  
258 scatter plots of the samples and compute the relative standard deviation. All presented  
259 results returned an  $\hat{R}$  value of one, indicating convergence of the sample chains. In addition,  
260 we visually inspected the sample chains, which appeared well mixed. Tables with estimated

261 posterior means, 95% CIs and relative standard deviations are found in Appendix B, and  
 262 RMSE is listed in Table 2.

263 We have also investigated the models using synthetic data to confirm the findings of  
 264 the results with real data. These synthetic experiments can be found in the supplementary.  
 265 Here we present the results obtained by the Bayesian model described in Section 3 for the  
 266 data depicted in Figure 3.

## 267 4.1 Single pass and Multiple pass

268 First, we consider the hemodialysis data for the ten patients shown in Figure 3. Beside  
 269 phosphate concentrations in the blood and dialysate depicted, we have hourly measurements  
 270 of the phosphate concentration in the dialysate ( $C_d$ ) for SP, the volume of the blood  
 271 compartment ( $V_b$ ) for both SP and MP, and the dialysate volume ( $V_d$ ) for MP.  $C_d$  was  
 272 measured when exiting the dialysate compartment after initializing the dialysis process. We  
 273 assume that the concentration of phosphate in the dialysis for SP is constant as suggested  
 274 by data, and for each patient, we compute  $C_d$  as the spatial average of the concentration  
 275 of phosphate from inlet to outlet of the dialysis machine. Table 1 lists  $C_d$ ,  $V_d$  and  $V_b$   
 276 estimated directly from available data and Figure A.1 and Figure A.2 in Appendix A  
 277 provide exploratory statistics of the corresponding data.

| Estimate |                | Patient |       |       |       |       |       |       |       |       |       |
|----------|----------------|---------|-------|-------|-------|-------|-------|-------|-------|-------|-------|
|          |                | 1       | 2     | 3     | 4     | 5     | 6     | 7     | 8     | 9     | 10    |
| SP       | $C_d$ [mmol/L] | 0.16    | 0.12  | 0.11  | 0.16  | 0.18  | 0.21  | 0.14  | 0.09  | 0.14  | 0.09  |
|          | $V_b$ [L]      | 16.88   | 17.74 | 16.92 | 21.20 | 18.20 | 14.74 | 15.32 | 13.04 | 20.20 | 18.00 |
| MP       | $V_b$ [L]      | 16.99   | 17.80 | 17.43 | 21.20 | 18.39 | 15.15 | 15.48 | 13.76 | 20.21 | 18.25 |
|          | $V_d$ [L]      | 22.61   | 23.00 | 26.57 | 31.93 | 28.51 | 20.15 | 23.42 | 14.24 | 28.59 | 23.25 |

Table 1: The mean concentration of phosphate in the dialysate for SP,  $C_d$ , the mean dialysate volume for MP,  $V_d$  and the mean extracellular volume,  $V_b$  for both SP and MP.

### 278 4.1.1 Estimation

279 The estimated phosphate concentrations obtained for SP are depicted in Figure 4 along  
 280 with the predicted relapse. The solid line represents the posterior mean, the full circles are  
 281 data points and the transparent region indicates the 95% CI i.e., the region that contains

282 95% of the samples. Considering the estimated phosphate concentrations for SP, we see  
283 that the sampler has computed a decent fit in terms RMSE in Table 2 and posterior mean  
284 with a narrow 95% CI for the treatment phase. However, there is a large 95% CI for the  
285 relapse phase.

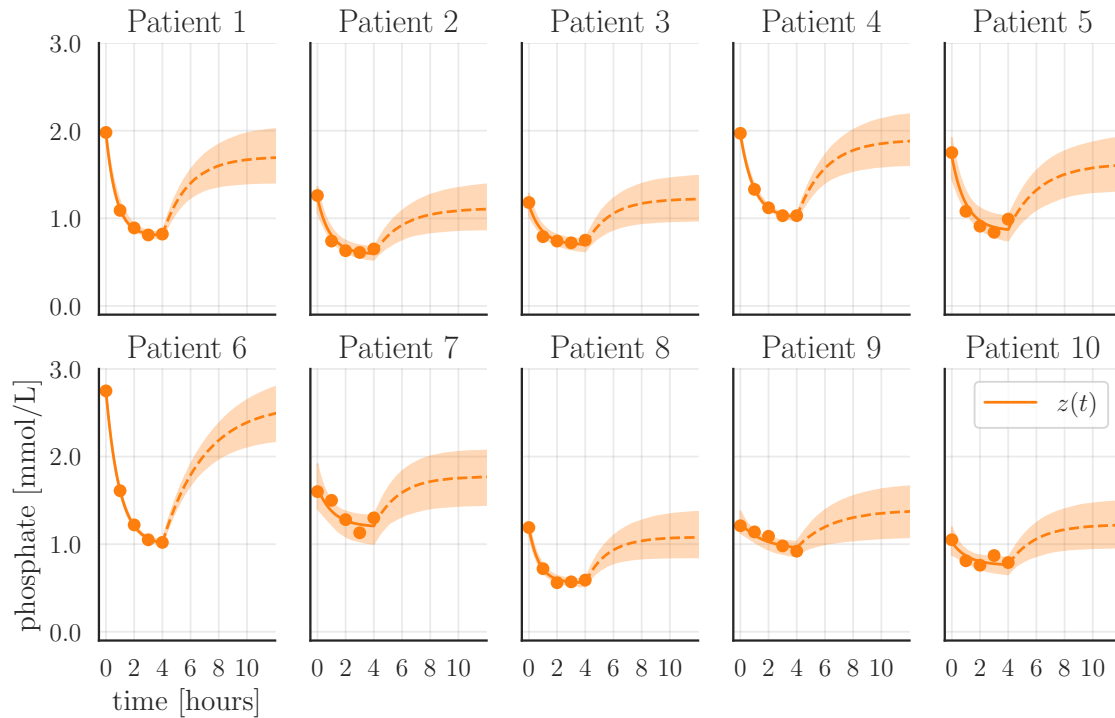

Figure 4: Estimated treatment and relapse for SP. The full lines are the posterior mean of the samples whereas the transparent regions represent the 95% CI. The full circles are measurements, and the dashed line is the posterior mean of the estimated relapse. For RMSE, see Table 2.

286 The corresponding parameter estimates with 95% CI for SP are visualized in Figure  
287 5 and listed in Table B.1 where the average relative standard deviation is 10.3%, 18.4%  
288 and 18.6% for  $C_s$ ,  $K_s$  and  $K_b$ , respectively. The full posterior density for the parameters  
289 for patient 2 is shown in Figure 6. We have chosen to only include a correlation plot for  
290 patient 2 in this section since it shows the general trend of the estimated parameters. The  
291 correlation plots for the remaining patients are found in Figure C.1-C.9 in Appendix C.

292 Figure 7 shows the estimated phosphate concentrations and predicted relapse phase for  
293 MP. Figure 7 and Table 2 show that the parameter estimation has found a satisfying fit  
294 both visually and in terms of RMSE for MP as for SP. However, the width of the 95% CIs  
295 is smaller for the relapse phase. The reduced uncertainty in the relapse can be explained by

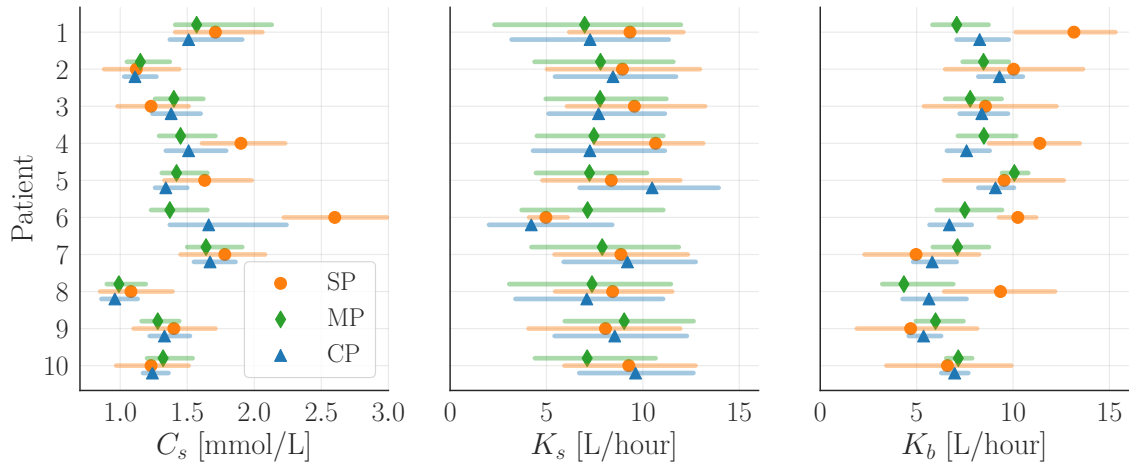

Figure 5: Visualization of the parameter estimates. The dots, diamonds and triangles represent the posterior mean for SP, MP and CP, respectively. The transparent region is the 95% CI. The full posterior of the parameters for patient 2 is shown in 6 and for the remaining patients in Figure C.1-C.9 in Appendix C.

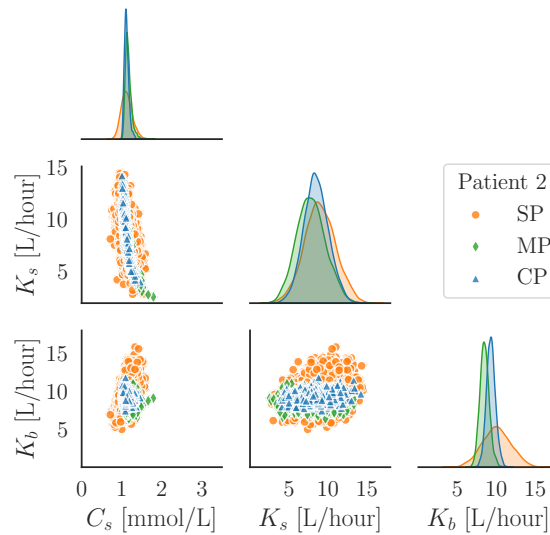

Figure 6: Plot of the posterior density and correlation of the parameters estimated for patient 2 for SP, MP and CP. The density plots show the posterior density functions, and the scatter plots show the posterior samples.

296 the reduced 95% CI for  $C_s$  in MP compared to SP which is shown in Figure 5 and Figure  
 297 6 and quantified by the decreased average standard deviation of 7.3% in Table B.2, i.e., a  
 298 reduction of 3%.

299 Moreover, Figure 5 shows a great reduction in the uncertainty about  $K_b$  as expected  
 300 from the addition of equation (2b) with a relative standard deviation of 9.6%, i.e., a  
 301 reduction of 9% compared to SP. However, the uncertainty about  $K_s$  remains largely

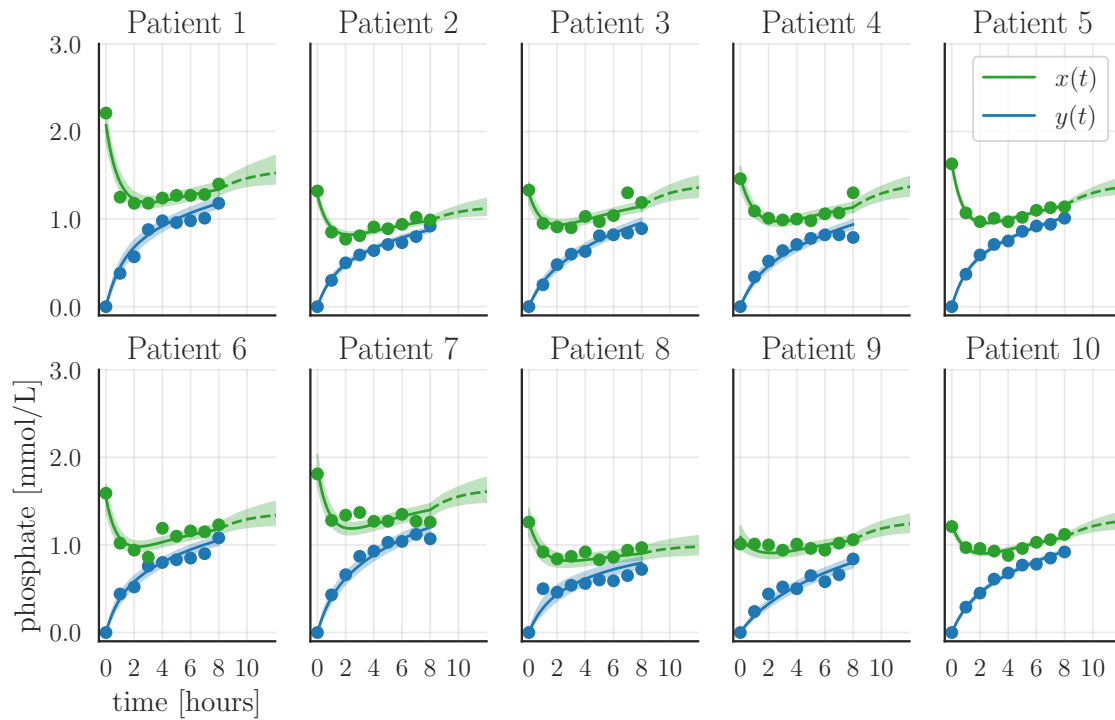

Figure 7: Estimated treatment and relapse for MP. The full lines are the posterior mean of the samples whereas the transparent regions represent the 95% CI. The full circles are measurements, and the dashed line is the posterior mean of the estimated relapse. For RMSE, see Table 2.

302 unaffected by the additional knowledge utilized by the MP model and the uncertainty  
 303 actually increases on average with an average relative standard deviation of 24.8%.

304 Considering the CP results in Figure 8, we see that CP finds a unified set of parameters  
 305 that describe the SP and MP sessions for each patient. Moreover, the CP estimates a  
 306 satisfying fit both visually and in terms of RMSE in Table 2. The parameter estimates  
 307 are very similar to the ones obtained by MP as seen in Figure 5 except for patient 6 and  
 308 with only a slight reduction compared to MP in average relative standard deviation, 6.9%,  
 309 22.9% and 8.2% for  $C_s$ ,  $K_s$  and  $K_b$ , respectively. A possible explanation for the difference  
 310 in  $K_s$  for patient 6 is the large difference in initial measured phosphate concentration,  
 311 indicating that steady state had not been reached before treatment onset.

312 The synthetic results in Figure S.2 and S.3 in the supplementary materials show that  
 313 with fixed  $C_s$  and a uniform prior on  $K_s$  and  $K_b$  (mimicking the parameter estimation in  
 314  $[1, 5, 2]$ ), we have a very limited identifiability of  $K_s$  and  $K_b$  for SP, whereas MP and CP  
 315 recover values very close to the true parameters with significantly lower uncertainty. In



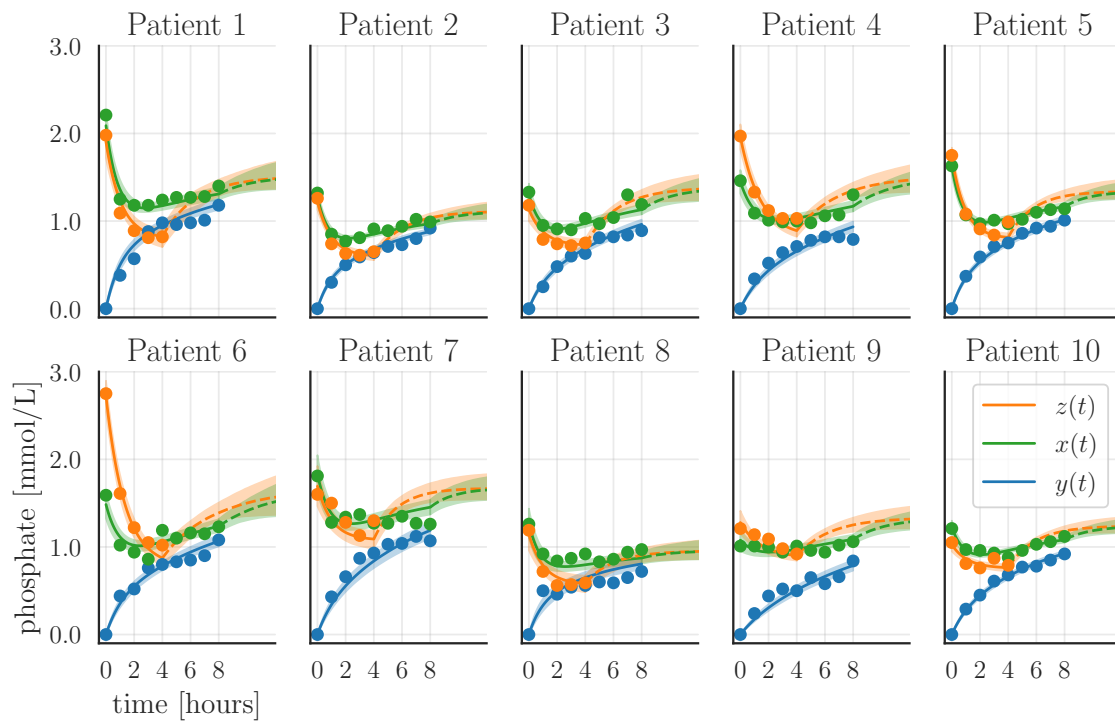

Figure 8: Estimated treatment and relapse for CP. The full lines are the posterior mean of the samples whereas the transparent regions represent the 95% CI. The full circles are measurements, and the dashed line is the posterior mean of the estimated relapse. For RMSE, see Table 2.

316 addition, the parameter estimates for  $K_s$  and  $K_b$  were highly correlated and this correlation  
317 was significantly reduced by MP and CP. We also considered the full Bayesian model  
318 with priors on the synthetic data and the results are depicted in Figure S.5 and S.6 in the  
319 supplementary materials. The results showed that MP and CP in general came closer to  
320 the true parameters with smaller 95% CI and showed similar results in terms of relative  
321 standard deviation.

322 In summary, the uncertainty associated with the SP results is reduced significantly  
323 by using the Bayesian model with priors compared to the standard parameter estimation  
324 without the clinical knowledge incorporated. For the Bayesian models, we see that MP and  
325 CP are superior to SP in estimating patient-specific parameters  $C_s$  and  $K_b$ , but that the  
326 gain of considering CP compared to MP is limited. However, we see that the uncertainty  
327 about  $K_s$  is large even when using all available data with the CP model. These findings  
328 are further supported by the synthetic results in the supplementary materials, where the  
329 estimates obtained by MP and CP are closer to the true parameter value and with less

330 uncertainty. Thus, based on the estimation results, it seems that the SP data without  
 331 relapse data or consecutive sessions are not sufficient for estimating the parameters reliably.

| Patient | SP                   | MP                   | CP                   |
|---------|----------------------|----------------------|----------------------|
| 1       | $2.14 \cdot 10^{-8}$ | $2.08 \cdot 10^{-4}$ | $1.67 \cdot 10^{-3}$ |
| 2       | $3.23 \cdot 10^{-6}$ | $5.06 \cdot 10^{-6}$ | $2.12 \cdot 10^{-4}$ |
| 3       | $1.69 \cdot 10^{-6}$ | $1.95 \cdot 10^{-5}$ | $2.59 \cdot 10^{-4}$ |
| 4       | $7.99 \cdot 10^{-9}$ | $1.79 \cdot 10^{-5}$ | $9.95 \cdot 10^{-4}$ |
| 5       | $3.79 \cdot 10^{-5}$ | $1.85 \cdot 10^{-7}$ | $1.11 \cdot 10^{-3}$ |
| 6       | $6.36 \cdot 10^{-9}$ | $3.99 \cdot 10^{-5}$ | $1.67 \cdot 10^{-3}$ |
| 7       | $4.88 \cdot 10^{-5}$ | $7.56 \cdot 10^{-5}$ | $1.25 \cdot 10^{-2}$ |
| 8       | $2.22 \cdot 10^{-7}$ | $4.27 \cdot 10^{-5}$ | $5.63 \cdot 10^{-4}$ |
| 9       | $2.87 \cdot 10^{-6}$ | $4.84 \cdot 10^{-5}$ | $8.18 \cdot 10^{-4}$ |
| 10      | $9.07 \cdot 10^{-6}$ | $9.41 \cdot 10^{-7}$ | $2.46 \cdot 10^{-4}$ |

Table 2: Computed RMSE for Figure 4, 7 and 8. We compute RMSE by the formula  $\text{RMSE} = \frac{1}{n} \sum_{i=1}^n (\hat{X}_i - X_i)^2$  where  $\hat{X}$  and  $X$  are the estimated and measured phosphate concentrations, respectively.

## 332 4.2 Consecutive SP sessions

333 Debowska et al. [5] present a data set consisting of 25 patients that were examined during  
 334 three consecutive SP sessions of a one-week dialysis treatment cycle. They present the  
 335 data as the average of the measurement for the 25 patients and we have read off the data  
 336 from the figures. Measurements were obtained hourly for a total duration of four hours  
 337 with the addition of a measurement 45 minutes after ended treatment, i.e., we have five SP  
 338 measurements and a relapse measurement for each of the three consecutive SP sessions.  
 339 We choose  $V_b = 20$  and  $C_d = 0$ .

### 340 4.2.1 Simulations and estimates

341 The aim of this subsection is to investigate the improvement of information obtained  
 342 by including relapse measurement and / or consecutive sessions in the SP model. We  
 343 investigate the four following scenarios, No Relapse (NR) where we consider the first SP  
 344 treatment only, Partial Relapse (PR) with the first SP treatment with a measured relapse  
 345 point, Full Relapse (FR) where we consider the first SP treatment with relapse point and  
 346 the first measured data point of the second SP, and Full Three Relapse (FTR) where we  
 347 include the data from all three SP consecutive sessions.

348 The results for the four scenarios are depicted in Figure 9. The measurements included  
349 in each parameter estimation are marked with colored dots, whereas the measurements  
350 not included in the model estimation are marked with black open circles. The posterior  
351 statistics for the parameters are shown in Figure 10 and listed in Table B.4. Correlation of  
352 the parameters is shown in Figure 11.

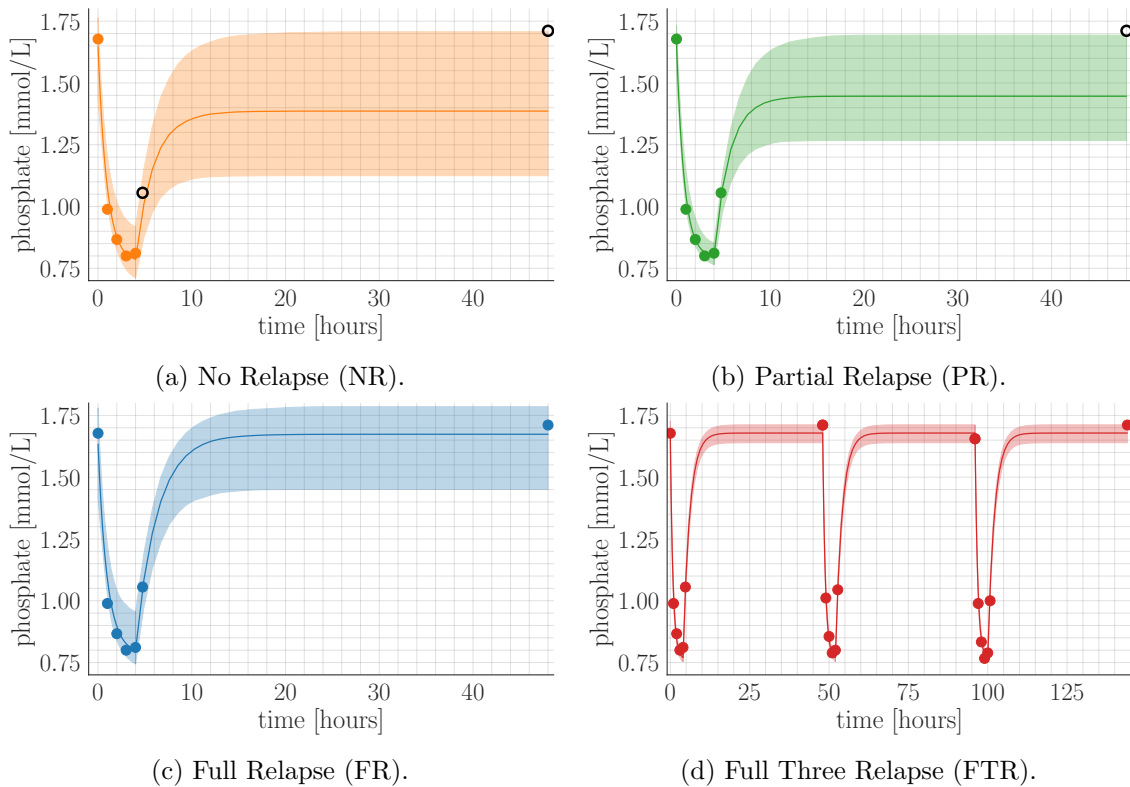

Figure 9: Four simulations for the relapse data. (a) first SP with no relapse data (NR), (b) first SP with a single relapse data point after 4.75 hours (PR), (c) first SP with full relapse data, i.e., after 4.75 and 48 hours (FR). Lastly (d) shows the fit when including all three consecutive SP treatments (FTR). The measurements are shown with colored circles. The open black circles in (a) and (b) indicate that the measurements are not used for estimation. RMSE is NR =  $6.18 \cdot 10^{-6}$ , PR =  $1.19 \cdot 10^{-6}$ , FR =  $1.07 \cdot 10^{-5}$  and FTR =  $9.36 \cdot 10^{-7}$ , respectively.

353 Figure 9a shows estimation without relapse measurement for a single SP session, the  
354 phosphate concentration has a quite large 95% CI and undershoots the relapse. If we  
355 consider the uncertainty in the correlation plot for the parameters in Figure 11 and Figure  
356 10, we see a large 95% CI for the parameter estimates and relative standard deviation  
357 in Table B.4 which is similar to the uncertainty associated with the estimate for the SP  
358 estimation in Section 4.1.

359 A model estimation including the measured relapse 45 minutes after ended treatment

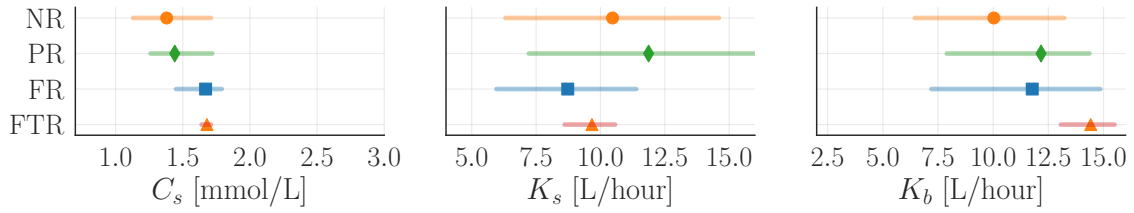

Figure 10: Posterior mean and 95% CI for the parameter estimates for the four scenarios, No relapse (NR), Partial relapse (PR), Full relapse (FR) and full-three relapse (FTR). The figure shows that the uncertainty about the parameter estimates decreases as the number of measurements increases.

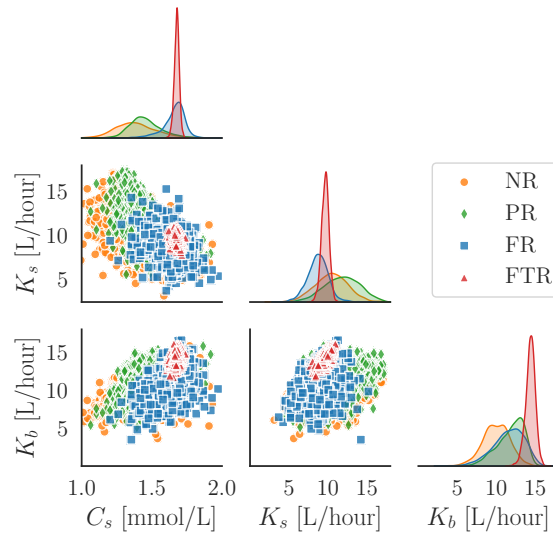

Figure 11: Plot of the posterior density and correlation for the parameter estimates for the four scenarios, No relapse (NR), Partial relapse (PR), Full relapse (FR) and full-three relapse (FTR). The density plots show the posterior density functions, and the scatter plots show the posterior samples. The uncertainty associated with the posterior mean of the parameters decreases as more information is included in terms of relapse measurement and /or consecutive sessions.

360 is depicted in Figure 9b. The 95% CIs for the phosphate concentration is slightly reduced,  
 361 but the 95% CIs for the parameters have barely changed as seen in Figure 10, Figure 11  
 362 and Table B.4. Hence, including a measurement after 45 minutes relapse has limited effect  
 363 on the uncertainty of the parameter estimates. This can also be seen by considering the  
 364 correlation plot in Figure 11, where the width of the distribution is only slightly changed. It  
 365 is noteworthy that the addition of the relapse point has such limited effect on the estimation.  
 366 However, this limited effect is due to the very rapid dynamics in the initial relapse phase.  
 367 The initial relapse is not very sensitive to small changes, whereas a relapse point measured  
 368 later e.g., after two hours, will have a larger effect on the estimation process due to the

369 slower change in the concentration.

370 Considering the full relapse in Figure 9c, we see the effect of having a relapse measure-  
371 ment several hours after ended treatment. The estimated steady state for the phosphate  
372 concentration has an increased posterior mean and narrower 95% CI compared to Figure  
373 9a and 9b. This increase is explained by the increase for  $C_s$  which can be seen in Figure  
374 10 and Figure 11. There is also a slight narrowing of the 95% CI for  $K_s$  whereas the effect  
375 on  $K_b$  is limited as the relative standard deviation actually increases from 16% to 18%  
376 compared to the partial relapse. Hence, including relapse measurements has limited effect  
377 on the identifiability of  $K_b$ , but reduces the uncertainty associated with the estimates for  
378  $C_s$  and  $K_s$ . This observation is expected based on the model (1), since we have  $K_b = 0$  in  
379 the relapse phase.

380 Lastly, if we have three consecutive SP treatments for the same patient, we can reduce  
381 the uncertainty even further, as shown in Figure 9d. The three consecutive SP treatments  
382 carry significant information since the repetition makes the estimates less sensitive to  
383 fluctuations in the data, which can also be seen in Figure 10 and Figure 11. Considering  
384 the relative standard deviation for  $K_s$  in Table B.4, we find that it decreases from 20% to  
385 5 % by considering the consecutive sessions compared to a single session. However, even  
386 in the case of a single session, our Bayesian approach has significantly smaller relative  
387 standard deviation compared to the estimates found by Debowska et al. [5] and Agar et  
388 al. [1], who report a relative standard deviation of 79% and 47%, respectively. Even for  
389  $K_b$ , we see a significant narrowing of the 95% CI. Thus, measuring consecutive sessions  
390 greatly increases the identifiability of all three model parameters as the relative standard  
391 deviation decreases significantly for all three parameter estimates, as seen in Table B.4.

392 We also investigated the effect of including relapse measurements for the synthetic  
393 data for SP, MP and CP. The results including relapse measurements are shown in Figure  
394 S.8-S.11 and results for two consecutive sessions are shown in Figure S.12 and S.13. Here  
395 we found that the consecutive sessions were more effective than relapse measurements to  
396 reduce the uncertainty of the parameters which aligns with the findings in Figure 9. In  
397 general for the synthetic data, we found that MP compared to SP had less uncertainty and  
398 came closer to the true parameter values.

## 399 5 Conclusion

400 Phosphate clearance with hemodialysis is crucial for patients with renal failure since  
401 abnormal levels of phosphate are associated with increased vascular calcification and  
402 mortality. We propose a Bayesian approach to parameter estimation for patients undergoing  
403 hemodialysis treatments (SP, MP and CP). The Bayesian approach allows us to formally  
404 include clinical knowledge in the model and to use uncertainty quantification to assess  
405 how reliably we can estimate the three model parameters: phosphate concentration in the  
406 bones, phosphate clearance from bone to blood and from blood to dialysate.

407 We validated and tested our Bayesian model on two data sets for patients with renal  
408 failure. The results showed that the uncertainty for the parameter estimates is greatly  
409 reduced by considering MP and CP compared to SP. However, for the parameter governing  
410 the diffusion rate between bone phosphate and blood, the uncertainty remained unchanged.  
411 We also investigated the impact of including relapse data and consecutive treatments. The  
412 results showed that including an early relapse measurement (after 45 minutes) had little  
413 effect on the estimation process if not combined with a measurement in the later relapse  
414 phase. The relapse measurements taken more than 45 minutes after ended treatment  
415 had significant impact on the reliability of the model parameters. Moreover, the results  
416 showed that we can reduce the relative standard deviation for the phosphate clearance  
417 from blood to bone from 20% to 5% by including consecutive sessions in the estimation  
418 process compared to estimation based on a single session.

419 Numerical results on synthetic data confirmed the findings obtained from the real data,  
420 and showed that the parameters were poorly identified for SP if no prior information was  
421 included. The uncertainty of the estimates greatly decreased when using the Bayesian  
422 model incorporating clinical knowledge, and the MP model generally was closer to the  
423 true parameter values of the model. Compared to existing parameter estimates of the  
424 phosphate clearance from bone to blood, our Bayesian model can estimate a parameter  
425 associated with significantly lower uncertainty for both SP and MP.

## 426 Acknowledgments

427 This work was supported by The Villum Foundation (grant no. 25893).

## 428 References

- 429 [1] B. U. Agar, A. Akonur, A. K. Cheung, and J. K. Leypoldt. “A simple method  
430 to estimate phosphorus mobilization in hemodialysis using only predialytic and  
431 postdialytic blood samples”. In: *Hemodialysis International* 15 (Oct. 2011), S9–S14.  
432 DOI: 10.1111/j.1542-4758.2011.00596.x.
- 433 [2] M. Andersen, K. O. Bangsgaard, and J. T. Ottesen. “Analytical solution of phosphate  
434 kinetics during and after single pass or multi pass dialysis”. In: *Submitted* (2022).
- 435 [3] C. Basile and D. Schneditz. “Haemodialysis adequacy monitoring for phosphate: an  
436 old problem with new solutions?” In: *Nephrology Dialysis Transplantation* 30.1 (Nov.  
437 2014), pp. 9–11. DOI: 10.1093/ndt/gfu351.
- 438 [4] C. Bianchi, E. Lanzarone, G. Casagrande, and M. L. Costantino. “A Bayesian  
439 approach for the identification of patient-specific parameters in a dialysis kinetic  
440 model”. In: *Statistical Methods in Medical Research* 28.7 (Jan. 2018), pp. 2069–2095.  
441 DOI: 10.1177/0962280217745572.
- 442 [5] M. Debowska, J. Poleszczuk, A. Wojcik-Zaluska, A. Ksiazek, and W. Zaluska. “Phos-  
443 phosphate Kinetics During Weekly Cycle of Hemodialysis Sessions: Application of Math-  
444 ematical Modeling”. In: *Artificial Organs* 39.12 (May 2015), pp. 1005–1014. DOI:  
445 10.1111/aor.12489.
- 446 [6] C. A. DeSoi and J. G. Umans. “Phosphate kinetics during high-flux hemodialysis.”  
447 In: *Journal of the American Society of Nephrology* 4.5 (Nov. 1993), pp. 1214–1218.  
448 DOI: 10.1681/asn.v4i51214.
- 449 [7] S. Eloit, R. Vanholder, and W. V. Biesen. “Less water for haemodialysis: is multiple  
450 pass the future pace to go?” In: *Nephrology Dialysis Transplantation* 27.11 (Nov.  
451 2012), pp. 3975–3978. DOI: 10.1093/ndt/gfs435.
- 452 [8] S. Eloit, W. V. Biesen, M. Axelsen, G. Glorieux, R. S. Pedersen, and J. G. Heaf.  
453 “Protein-bound solute removal during extended multipass versus standard hemodialy-  
454 sis”. In: *BMC Nephrology* 16.1 (Apr. 2015). DOI: 10.1186/s12882-015-0056-y.
- 455 [9] A. Gelman, D. Lee, and J. Guo. “Stan”. In: *Journal of Educational and Behavioral*  
456 *Statistics* 40.5 (Oct. 2015), pp. 530–543. DOI: 10.3102/1076998615606113.

- 457 [10] A. Gelman and D. B. Rubin. “Inference from Iterative Simulation Using Multiple  
458 Sequences”. In: *Statistical Science* 7.4 (Nov. 1992). DOI: 10.1214/ss/1177011136.
- 459 [11] J.-P. Gutzwiller. “Estimating phosphate removal in haemodialysis: an additional  
460 tool to quantify dialysis dose”. In: *Nephrology Dialysis Transplantation* 17.6 (June  
461 2002), pp. 1037–1044. DOI: 10.1093/ndt/17.6.1037.
- 462 [12] J. G. Heaf, M. Axelsen, and R. S. Pedersen. “Multipass haemodialysis: a novel  
463 dialysis modality”. In: *Nephrology Dialysis Transplantation* 28.5 (Nov. 2012),  
464 pp. 1255–1264. DOI: 10.1093/ndt/gfs484.
- 465 [13] M. D. Hoffman and A. Gelman. “The no-U-turn sampler: Adaptively setting path  
466 lengths in Hamiltonian Monte Carlo”. eng. In: *Journal of Machine Learning Research*  
467 15 (2014), pp. 1593–1623. ISSN: 15337928, 15324435.
- 468 [14] H. Huang, A. Handel, and X. Song. “A Bayesian approach to estimate parameters  
469 of ordinary differential equation”. In: *Computational Statistics* 35.3 (Feb. 2020),  
470 pp. 1481–1499. DOI: 10.1007/s00180-020-00962-8.
- 471 [15] O. S. Iheagwara, T. S. Ing, C. M. Kjellstrand, and S. Q. Lew. “Phosphorus, phospho-  
472 rous, and phosphate”. In: *Hemodialysis International* (Dec. 2012), n/a–n/a. DOI:  
473 10.1111/hdi.12010.
- 474 [16] B. Kestenbaum, J. N. Sampson, K. D. Rudser, D. J. Patterson, S. L. Seliger, B. Young,  
475 D. J. Sherrard, and D. L. Andress. “Serum Phosphate Levels and Mortality Risk  
476 among People with Chronic Kidney Disease”. In: *Journal of the American Society  
477 of Nephrology* 16.2 (Dec. 2004), pp. 520–528. DOI: 10.1681/asn.2004070602.
- 478 [17] S. H. Laursen, A. Buus, M. H. Jensen, P. Vestergaard, and O. K. Hejlesen. “Distri-  
479 bution Volume Assessment Compartment Modelling: Theoretic Phosphate Kinetics  
480 in Steady State Hemodialys Patients”. In: *The International Journal of Artificial  
481 Organs* 38.11 (Aug. 2015), pp. 580–587. DOI: 10.5301/ijao.5000449.
- 482 [18] S. H. Laursen, P. Vestergaard, and O. K. Hejlesen. “Phosphate Kinetic Models in  
483 Hemodialysis: A Systematic Review”. In: *American Journal of Kidney Diseases* 71.1  
484 (Jan. 2018), pp. 75–90. DOI: 10.1053/j.ajkd.2017.07.016.



- 485 [19] R. LeVeque. *Finite Difference Methods for Ordinary and Partial Differential Equations: Steady-State and Time-Dependent Problems*. USA: Society for Industrial and  
486 Applied Mathematics, 2007. ISBN: 0898716292.
- 488 [20] J. Poleszczuk, M. Debowska, A. Wojcik-Zaluska, A. Ksiazek, and W. Zaluska. “Phos-  
489 phosphate Kinetics in Hemodialysis: Application of Delayed Pseudo One-Compartment  
490 Model”. In: *Blood Purification* 42.3 (2016), pp. 177–185. DOI: 10.1159/000445934.
- 491 [21] C. P. Robert and G. Casella. *Monte Carlo Statistical Methods*. Springer New York,  
492 2004. DOI: 10.1007/978-1-4757-4145-2.
- 493 [22] J. Russell-Buckland, C. P. Barnes, and I. Tachtsidis. “A Bayesian framework for the  
494 analysis of systems biology models of the brain”. In: *PLOS Computational Biology*  
495 15.4 (Apr. 2019). Ed. by J. Beck, e1006631. DOI: 10.1371/journal.pcbi.1006631.
- 496 [23] R. C. Smith. *Uncertainty Quantification: Theory, Implementation, and Applications*.  
497 USA: Society for Industrial and Applied Mathematics, 2014. ISBN: 978-1-611973-21-1.
- 498 [24] E. M. Spalding, P. W. Chamney, and K. Farrington. “Phosphate kinetics during  
499 hemodialysis: Evidence for biphasic regulation”. In: *Kidney International* 61.2 (Feb.  
500 2002), pp. 655–667. DOI: 10.1046/j.1523-1755.2002.00146.x.
- 501 [25] R. Subramanian and R. Khardori. “Severe Hypophosphatemia: Pathophysiologic  
502 Implications, Clinical Presentations, and Treatment”. In: *Medicine* 79.1 (Jan. 2000),  
503 pp. 1–8. DOI: 10.1097/00005792-200001000-00001.
- 504 [26] J. Vanlier, C. Tiemann, P. Hilbers, and N. van Riel. “Parameter uncertainty in  
505 biochemical models described by ordinary differential equations”. In: *Mathematical*  
506 *Biosciences* 246.2 (Dec. 2013), pp. 305–314. DOI: 10.1016/j.mbs.2013.03.006.

507 **A Summary statistics**

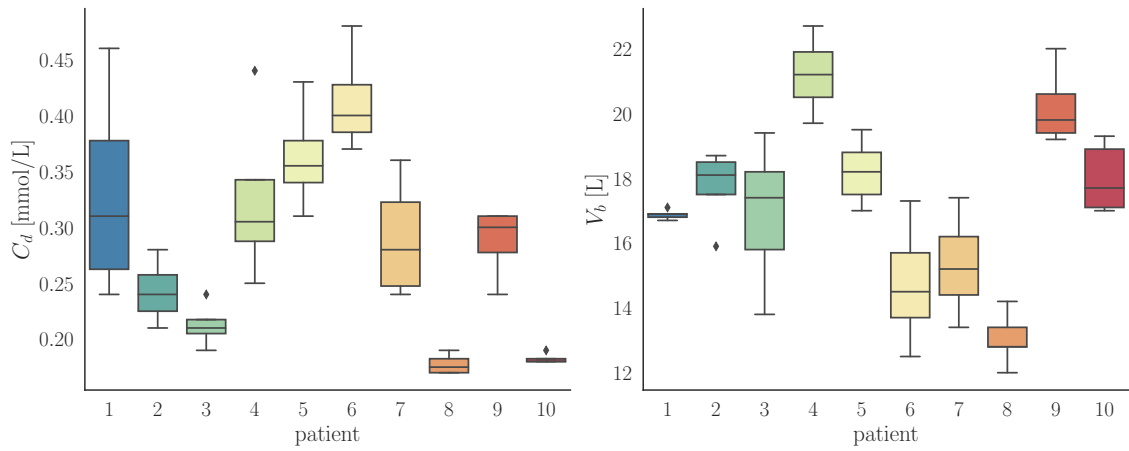

Figure A.1: Boxplots of the measured parameters  $C_d$  and  $V_b$  for the SP sessions in Figure 3.

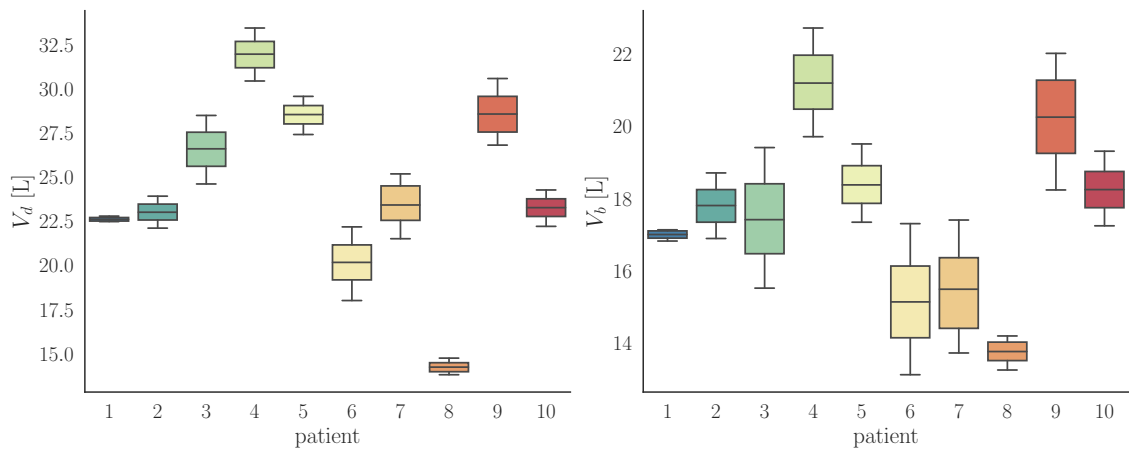

Figure A.2: Boxplots of the measured parameters  $V_b$  and  $V_d$  for the MP sessions in Figure 3.

508 **B Tables**

| Patient | $C_s$ |      |      |                                  | $K_s$ |       |       |                                  | $K_b$ |       |       |                                  |
|---------|-------|------|------|----------------------------------|-------|-------|-------|----------------------------------|-------|-------|-------|----------------------------------|
|         | l     | m    | u    | $\frac{\text{std}}{\text{mean}}$ | l     | m     | u     | $\frac{\text{std}}{\text{mean}}$ | l     | m     | u     | $\frac{\text{std}}{\text{mean}}$ |
| 1       | 1.41  | 1.71 | 2.06 | 9%                               | 6.18  | 9.33  | 12.1  | 16%                              | 10.14 | 13.16 | 15.31 | 10%                              |
| 2       | 0.88  | 1.12 | 1.44 | 13%                              | 5.03  | 8.94  | 12.96 | 22%                              | 6.48  | 10.03 | 13.63 | 17%                              |
| 3       | 0.98  | 1.23 | 1.51 | 11%                              | 6.06  | 9.56  | 13.23 | 19%                              | 5.38  | 8.57  | 12.25 | 21%                              |
| 4       | 1.61  | 1.90 | 2.23 | 8%                               | 7.50  | 10.66 | 13.13 | 13%                              | 8.75  | 11.39 | 13.46 | 11%                              |
| 5       | 1.33  | 1.63 | 1.98 | 10%                              | 4.79  | 8.36  | 11.94 | 22%                              | 6.42  | 9.54  | 12.63 | 17%                              |
| 6       | 2.22  | 2.60 | 2.99 | 8%                               | 4.10  | 4.97  | 6.10  | 10%                              | 9.27  | 10.25 | 11.20 | 5%                               |
| 7       | 1.45  | 1.78 | 2.08 | 9%                               | 5.42  | 8.86  | 12.33 | 20%                              | 2.30  | 4.97  | 8.24  | 30%                              |
| 8       | 0.85  | 1.08 | 1.39 | 13%                              | 5.45  | 8.43  | 11.52 | 18%                              | 6.43  | 9.35  | 12.18 | 16%                              |
| 9       | 1.10  | 1.4  | 1.71 | 11%                              | 4.07  | 8.06  | 11.93 | 25%                              | 1.90  | 4.69  | 8.14  | 34%                              |
| 10      | 0.97  | 1.23 | 1.51 | 11%                              | 5.93  | 9.27  | 12.73 | 19%                              | 3.43  | 6.60  | 9.91  | 25%                              |

Table B.1: Median (m), lower (l) and upper (u) 95% CI and relative standard deviation ( $\frac{\text{std}}{\text{mean}}$ ) for the parameters for the SP estimation.

| Patient | $C_s$ |      |      |                                  | $K_s$ |      |       |                                  | $K_b$ |       |       |                                  |
|---------|-------|------|------|----------------------------------|-------|------|-------|----------------------------------|-------|-------|-------|----------------------------------|
|         | l     | m    | u    | $\frac{\text{std}}{\text{mean}}$ | l     | m    | u     | $\frac{\text{std}}{\text{mean}}$ | l     | m     | u     | $\frac{\text{std}}{\text{mean}}$ |
| 1       | 1.41  | 1.57 | 2.13 | 12%                              | 2.30  | 6.98 | 11.97 | 38%                              | 5.82  | 7.08  | 8.73  | 10%                              |
| 2       | 1.05  | 1.15 | 1.37 | 7%                               | 4.38  | 7.80 | 11.58 | 24%                              | 7.39  | 8.47  | 9.78  | 7%                               |
| 3       | 1.26  | 1.40 | 1.62 | 7%                               | 4.96  | 7.78 | 11.22 | 21%                              | 6.48  | 7.78  | 9.41  | 10%                              |
| 4       | 1.29  | 1.45 | 1.71 | 7%                               | 4.50  | 7.46 | 11.06 | 23%                              | 7.14  | 8.49  | 10.16 | 9%                               |
| 5       | 1.31  | 1.42 | 1.65 | 6%                               | 4.45  | 7.23 | 10.21 | 22%                              | 9.43  | 10.07 | 10.79 | 3%                               |
| 6       | 1.23  | 1.37 | 1.65 | 8%                               | 3.71  | 7.13 | 11.06 | 26%                              | 6.04  | 7.50  | 9.43  | 11%                              |
| 7       | 1.50  | 1.64 | 1.91 | 6%                               | 4.22  | 7.89 | 11.86 | 24%                              | 5.84  | 7.12  | 8.75  | 11%                              |
| 8       | 0.90  | 0.99 | 1.19 | 7%                               | 3.07  | 7.36 | 11.45 | 28%                              | 3.22  | 4.34  | 6.9   | 20%                              |
| 9       | 1.16  | 1.28 | 1.44 | 6%                               | 5.95  | 9.03 | 12.63 | 19%                              | 4.96  | 5.98  | 7.43  | 10%                              |
| 10      | 1.2   | 1.32 | 1.54 | 7%                               | 4.40  | 7.11 | 10.66 | 23%                              | 6.54  | 7.16  | 7.88  | 5%                               |

Table B.2: Median (m), lower (l) and upper (u) 95% CI and relative standard deviation ( $\frac{\text{std}}{\text{mean}}$ ) for the parameters for MP estimation.

| Patient | $C_s$ |      |      |                                  | $K_s$ |       |       |                                  | $K_b$ |      |       |                                  |
|---------|-------|------|------|----------------------------------|-------|-------|-------|----------------------------------|-------|------|-------|----------------------------------|
|         | l     | m    | u    | $\frac{\text{std}}{\text{mean}}$ | l     | m     | u     | $\frac{\text{std}}{\text{mean}}$ | l     | m    | u     | $\frac{\text{std}}{\text{mean}}$ |
| 1       | 1.37  | 1.51 | 1.91 | 8%                               | 3.19  | 7.26  | 11.34 | 28%                              | 7.07  | 8.27 | 9.78  | 8%                               |
| 2       | 1.03  | 1.11 | 1.27 | 5%                               | 5.44  | 8.45  | 11.72 | 19%                              | 8.2   | 9.30 | 10.51 | 6%                               |
| 3       | 1.24  | 1.38 | 1.60 | 7%                               | 5.11  | 7.70  | 11.14 | 19%                              | 7.23  | 8.38 | 9.74  | 8%                               |
| 4       | 1.34  | 1.51 | 1.79 | 8%                               | 4.30  | 7.25  | 11.14 | 24%                              | 6.57  | 7.59 | 8.79  | 7%                               |
| 5       | 1.26  | 1.34 | 1.50 | 5%                               | 6.72  | 10.48 | 13.93 | 18%                              | 8.20  | 9.09 | 10.05 | 5%                               |
| 6       | 1.37  | 1.66 | 2.24 | 14%                              | 2.02  | 4.21  | 8.41  | 39%                              | 5.67  | 6.70 | 7.86  | 8%                               |
| 7       | 1.55  | 1.67 | 1.86 | 5%                               | 5.89  | 9.20  | 12.74 | 19%                              | 4.82  | 5.81 | 7.08  | 10%                              |
| 8       | 0.86  | 0.96 | 1.13 | 7%                               | 3.39  | 7.09  | 11.05 | 27%                              | 4.27  | 5.64 | 7.59  | 16%                              |
| 9       | 1.22  | 1.33 | 1.52 | 6%                               | 5.42  | 8.54  | 12.28 | 20%                              | 4.59  | 5.36 | 6.27  | 9%                               |
| 10      | 1.17  | 1.24 | 1.36 | 4%                               | 6.70  | 9.62  | 12.62 | 16%                              | 6.28  | 6.97 | 7.68  | 5%                               |

Table B.3: Median (m), lower (l) and upper (u) 95% CI and relative standard deviation ( $\frac{\text{std}}{\text{mean}}$ ) for the parameters for CP estimation.

|     | $C_s$ |      |      |                                  | $K_s$ |       |       |                                  | $K_b$ |       |       |                                  |
|-----|-------|------|------|----------------------------------|-------|-------|-------|----------------------------------|-------|-------|-------|----------------------------------|
|     | l     | m    | u    | $\frac{\text{std}}{\text{mean}}$ | l     | m     | u     | $\frac{\text{std}}{\text{mean}}$ | l     | m     | u     | $\frac{\text{std}}{\text{mean}}$ |
| NR  | 1.11  | 1.37 | 1.74 | 11%                              | 6.44  | 10.51 | 14.84 | 20%                              | 6.48  | 10.04 | 13.53 | 18%                              |
| PR  | 1.25  | 1.45 | 1.71 | 8%                               | 7.57  | 11.70 | 15.61 | 18%                              | 8.18  | 12.17 | 14.42 | 14%                              |
| FR  | 1.49  | 1.68 | 1.79 | 4%                               | 5.97  | 8.75  | 11.21 | 15%                              | 7.77  | 11.94 | 14.88 | 16%                              |
| FTR | 1.64  | 1.68 | 1.71 | 1%                               | 8.64  | 9.66  | 10.57 | 5%                               | 13.01 | 14.4  | 15.51 | 4%                               |

Table B.4: Median (m), lower (l) and upper (u) 95% CI and relative standard deviation ( $\frac{\text{std}}{\text{mean}}$ ) for the relapse data.

## C Correlation plots for SP and MP

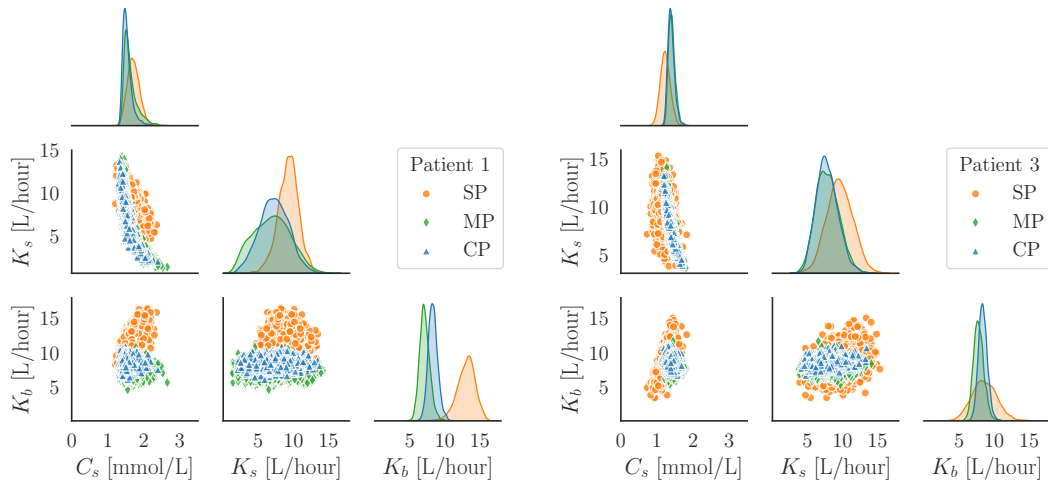

Figure C.1: Correlation and posterior density for the patient 1.

Figure C.2: Correlation and posterior density for the patient 3.

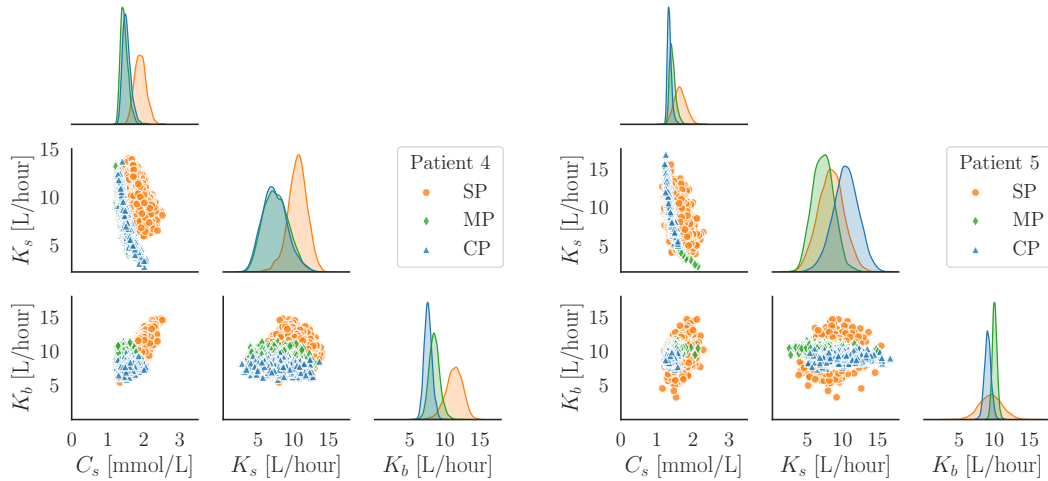

Figure C.3: Correlation and posterior density for the patient 4.

Figure C.4: Correlation and posterior density for the patient 5.

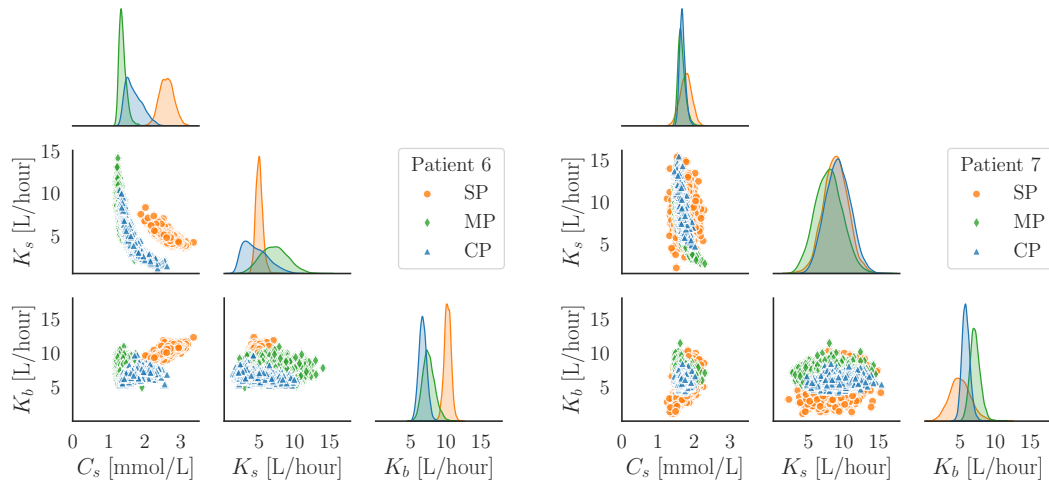

Figure C.5: Correlation and posterior density for the patient 6.

Figure C.6: Correlation and posterior density for the patient 7.

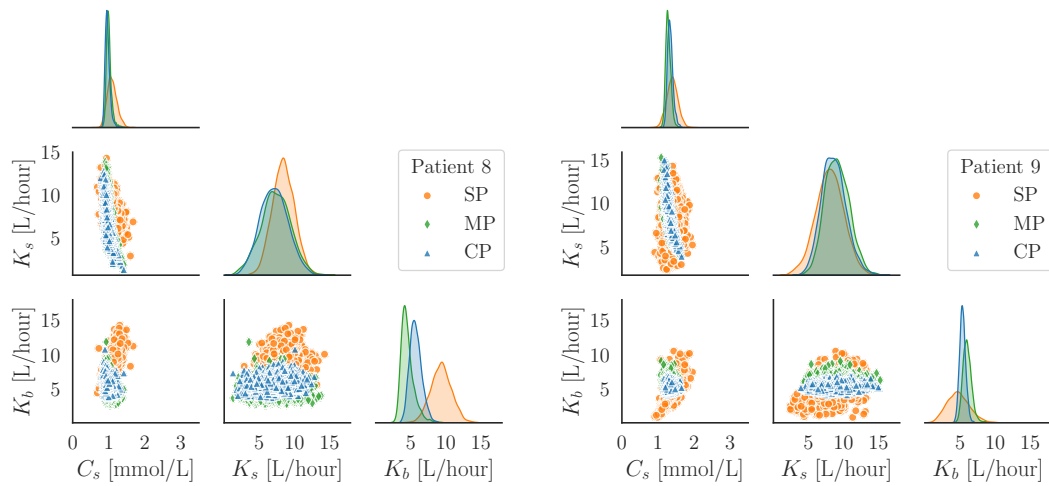

Figure C.7: Correlation and posterior density for the patient 8.

Figure C.8: Correlation and posterior density for the patient 9.

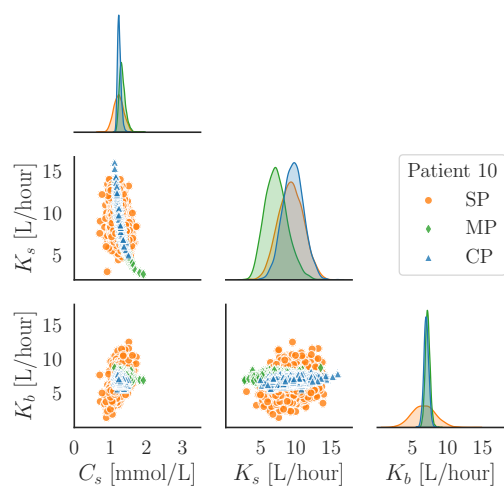

Figure C.9: Correlation and posterior density for the patient 10.
